# Supplementary material for: Electrochemical CO2reduction to methane with remarkably high Faradaic efficiency in the presence of a proton permeable membrane
Source: Royal Society of Chemistry journal article supplement (doi:10.1039/d0ee02189j), 2020-01-01
Supplement: d0ee02189j1.pdf [file d0ee02189j1.pdf]

## Electronic Supplementary Information

### Electrochemical CO<sub>2</sub> Reduction to Methane with Remarkably High Faradaic Efficiency in the Presence of a Proton Permeable Membrane

Hanqing Pan<sup>a</sup> and Christopher J. Barile<sup>a\*</sup>

<sup>a</sup> Department of Chemistry, University of Nevada, Reno

\*E-mail: cbarile@unr.edu

#### Table of Contents

|                                                                                                                                                                                                                                                                                              |     |
|----------------------------------------------------------------------------------------------------------------------------------------------------------------------------------------------------------------------------------------------------------------------------------------------|-----|
| Experimental section.....                                                                                                                                                                                                                                                                    | S3  |
| Calculations.....                                                                                                                                                                                                                                                                            | S5  |
| Figure S1. Linear sweep voltammograms of carbon and Cu foil modified with 2 μm and 15 μm Nafion overlayers in N <sub>2</sub> -saturated 0.1 M NaHCO <sub>3</sub> electrolyte at a scan rate of 10 mV/s.....                                                                                  | S6  |
| Figure S2. Linear sweep voltammograms of PVDF-modified carbon and Cu foil in N <sub>2</sub> -saturated 0.1 M NaHCO <sub>3</sub> electrolyte at a scan rate of 10 mV/s.....                                                                                                                   | S6  |
| Figure S3. Schematic of custom-made cell for gas collection.....                                                                                                                                                                                                                             | S7  |
| Figure S4. Chronoamperometry curves over 1 hr of electrochemical CO <sub>2</sub> reduction using bare, Nafion-modified, and PVDF-modified carbon and Cu electrodes (A) and bare and Nafion-modified Ni and Zn electrodes (B).....                                                            | S8  |
| Figure S5. Chronoamperometry curves over 1 hr of electrochemical CO <sub>2</sub> reduction using varying thicknesses of Nafion overlayer on Cu electrodes.....                                                                                                                               | S9  |
| Figure S6. Chronoamperometry curves over 1 hr of electrochemical CO <sub>2</sub> reduction using Cu electrode modified with 15 μm of Nafion at various voltages.....                                                                                                                         | S9  |
| Figure S7. Chronoamperometry (A), Faradaic efficiency (B), and rate (C) of CH <sub>4</sub> production over 10 hours at -0.38 V vs. RHE using a Cu electrode modified with 15 μm Nafion overlayer.....                                                                                        | S10 |
| Figure S8. Total Faradaic efficiencies of carbon-containing products obtained from bare electrodes and electrodes modified with 15 μm of Nafion or PVDF (A), varying the thickness of Nafion overlayer on Cu electrode (B), and varying the voltage of the electrochemical reaction (C)..... | S11 |

|                                                                                                                                                                                                                  |     |
|------------------------------------------------------------------------------------------------------------------------------------------------------------------------------------------------------------------|-----|
| Table S1. $R^2$ values obtained from linear sweep voltammograms fitted with a linear trend line.....                                                                                                             | S12 |
| Table S2. Faradaic efficiencies for CO, CH <sub>4</sub> , and HCOOH for all catalysts at -0.89 V vs. RHE on bare substrates, 15 $\mu$ m Nafion-modified substrates, and 15 $\mu$ m PVDF-modified substrates..... | S12 |
| Table S3. Summary of various electrocatalysts for electrochemical CO <sub>2</sub> reduction to CH <sub>4</sub> reported in literature.....                                                                       | S13 |

## **Experimental**

### **Materials and electrode preparation.**

Nafion D520 dispersion and carbon paper (AvCarb EP40T) were purchased from Fuel Cell Store. Cu foil (99.99% purity) was purchased from All-Foils, Inc, Ni foil (99.9% purity) was purchased from Goodfellow, Inc., and Zn foil (99.99% purity) was purchased from Belmont Metals. Sodium bicarbonate was purchased from Sigma Aldrich. CO<sub>2</sub> and CO were purchased from Airgas. Nafion-modified electrodes were fabricated by drop-casting the Nafion dispersion directly onto the substrate.

### **Electrochemical Measurements and Material Characterization.**

All electrochemical measurements were performed using a VSP-300 Biologic Potentiostat. All electrochemical data were collected versus a Ag/AgCl reference electrode and converted to the reversible hydrogen electrode (RHE) scale by  $V_{(vs. RHE)} = V_{(measured\ vs.\ Ag/AgCl)} + 0.21 + 0.059 \times 6.8$  (where 6.8 is the pH of solution). All values are reported versus RHE. Current densities are reported with respect to geometric area of the working electrode. For linear sweep voltammogram studies, the geometric working electrode area was 0.218 cm<sup>2</sup> and for all other experiments, the geometric working electrode area was 5.0 cm<sup>2</sup>. To evaluate the CO<sub>2</sub> reduction activity of the thin films, the working electrodes were studied in 0.1 M sodium bicarbonate buffer sparged with CO<sub>2</sub> gas for at least 30 min using a one-compartment, three-electrode configuration. The thin films on carbon paper served as the working electrode, a Pt wire was used as the counter electrode, and a Ag/AgCl electrode was used as the reference electrode. Electrochemical impedance spectroscopy (EIS) was performed in 0.1 M sodium bicarbonate buffer sparged with CO<sub>2</sub> gas using a three-electrode configuration cell at -0.89 V vs. RHE. The frequency was varied from 200 kHz to 100 mHz sinusoidally with an amplitude of 10 mV. Scanning electron microscope (SEM) images and

energy-dispersive X-ray (EDS) analysis were obtained for each sample using a JEOL JSM-6010LA analytical SEM or a JEOL JSM-7100F field emission SEM operated using an accelerating voltage of 15 kV. Onset potentials were calculated by determining the voltage at which the current density reached 15% of the maximum current density for each linear sweep voltammogram.

**Product Determination.** Electrochemical reactions were performed chronoamperometrically at -0.89 V vs. RHE (and at -0.38 V, -0.13 V, and 0.12 V vs. RHE for voltage-dependent experiments) for one hour unless otherwise noted using carbon as a counter electrode in a beaker for determining liquid and solid products and Pt wire as a counter electrode in a custom-made cell for determining gas products (Figure S3). During chronoamperometry, CO<sub>2</sub> was continuously sparged through the solution (2.5 mL) at a rate of 5 cm<sup>3</sup>/min. Liquid products were quantified using a Varian 400 MHz NMR Spectrometer using DMF as an internal standard. The water in the reaction solution was evaporated under reduced pressure, and sodium formate along with other residual solids from the electrolyte were collected and dissolved in D<sub>2</sub>O. Liquid products were extracted from the reaction solution using deuterated chloroform. Gas products were quantified using a SRI 8610C gas chromatograph equipped with a flame ionization detector (FID) and a methanizer. The limits of detection for formate, liquid products, and gas products were determined to be 11 μM, 85 μM, and 1 ppm, respectively. All experiments were at least duplicated, and all error bars presented are the standard deviation among the multiple trials.

## Calculations

### *Effect of Mass Transport on LSV Onset Potential with PVDF-modified Electrodes*

The permeability of CO<sub>2</sub> in PVDF was taken to be  $2.16 \times 10^{-17}$  mol-cm/cm<sup>2</sup>-s-Pa, a value obtained from Flaconnache *et al.*<sup>38</sup> Because the thickness of the PVDF membrane is 15 μm and the pressure of CO<sub>2</sub> is 1 atm, the flux of CO<sub>2</sub> through the membrane is calculated to be  $1.5 \times 10^{-9}$  mol/cm<sup>2</sup>-s. This flux value is then compared to the maximum theoretical rate of consumption of CO<sub>2</sub> at the electrode-polymer interface. The maximum CO<sub>2</sub> consumption rate is determined from the current density of the LSV, assuming all CO<sub>2</sub> is reduced to either CO or HCOOH. Because these products require only 2 e<sup>-</sup>/mol, they consume CO<sub>2</sub> faster than more highly reduced products such as CH<sub>4</sub>. Therefore, assuming a 100% yield of CO or HCOOH is an upper bound for the CO<sub>2</sub> consumption rate. For the PVDF-covered Cu electrode, the current density at the onset potential (-0.55 V) of the LSV is -0.26 mA/cm<sup>2</sup>. From this value, the upper bound for the CO<sub>2</sub> consumption rate is  $1.3 \times 10^{-9}$  mol/cm<sup>2</sup>-s, a value less than the calculated CO<sub>2</sub> flux. Therefore, these calculations suggest that CO<sub>2</sub> mass transport is not a limiting factor during the onset potential region of the LSVs with 15 μm PVDF overlayers.

### *Effect of Mass Transport on CO<sub>2</sub> Electrocatalysis on Nafion-modified Electrodes*

The permeability of CO<sub>2</sub> in Nafion was taken to be  $8.70 \times 10^{-16}$  mol-cm/cm<sup>2</sup>-s-Pa, a value obtained from Ren *et al.*<sup>39</sup> With a 15 μm Nafion overlayer, the flux of CO<sub>2</sub> is calculated to be  $5.9 \times 10^{-8}$  mol/cm<sup>2</sup>-s. The steady state current of the chronoamperometry of this electrode is about -0.5 mA/cm<sup>2</sup>. From this current density, we use the protocol described in the above paragraph to determine that the maximum theoretical CO<sub>2</sub> consumption rate at the electrode-polymer interface is  $2.6 \times 10^{-9}$  mol/cm<sup>2</sup>-s. In other words, the maximum CO<sub>2</sub> consumption rate is more than an order of magnitude less than CO<sub>2</sub> flux through Nafion. These calculations indicate that CO<sub>2</sub> electrocatalysis is not limited by CO<sub>2</sub> availability at the electrode-polymer interface with a 15 μm Nafion overlayer. Analogous calculations with a 183 μm Nafion overlayer give a calculated CO<sub>2</sub> flux of  $4.8 \times 10^{-9}$  mol/cm<sup>2</sup>-s, a value much closer to the maximum CO<sub>2</sub> consumption rate.

### *Effect of Electrical Conductivity of Nafion on Voltammetry*

Given that the bulk electrical conductivity of Nafion is less than  $10^{-4}$  S/cm,<sup>40</sup> and that the maximum current density of the LSV of the Cu electrode with a 15 μm Nafion layer in Fig. 1B is -3.5 mA/cm<sup>2</sup>, the calculated voltage drop due to resistance across a 15 μm Nafion layer is greater than 50 mV, a value large enough to give rise to changes in the shape of the voltammogram.

### *Percent Conversion of CO<sub>2</sub>*

As noted in the experimental section, the reaction vessel was continuously sparged at a rate of 5 cm<sup>3</sup>/min with CO<sub>2</sub> during chronoamperometry. The number of moles of electrons consumed during catalysis is much less than the number of moles of CO<sub>2</sub> passed through the electrochemical cell. For the case of the electrode with the highest CH<sub>4</sub> Faradaic efficiency (88%), we calculate that the total CO<sub>2</sub> conversion yield is 0.1%. In an industrial application, this low conversion yield could be improved by optimizing the CO<sub>2</sub> flow rate and electrode porosity as well as by using multiple passes of the same CO<sub>2</sub> reactant stream.

## Supplementary Figures

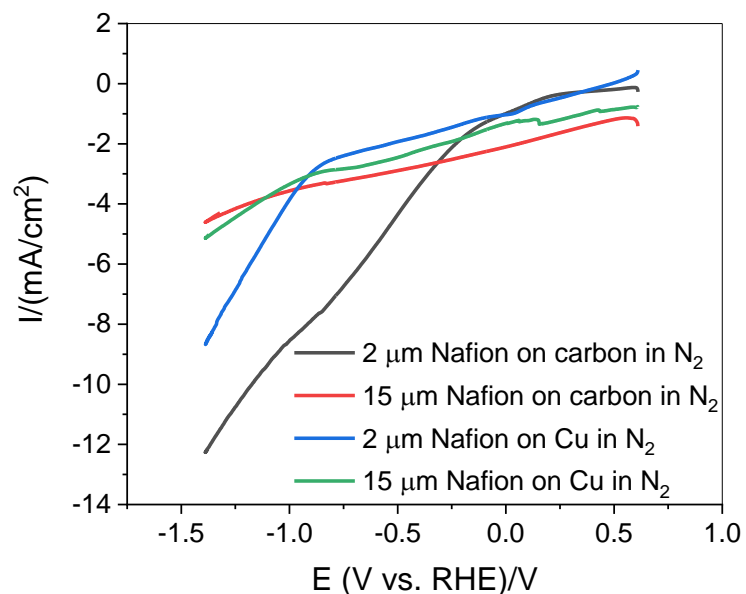

Figure S1. Linear sweep voltammograms of carbon and Cu foil modified with 2  $\mu\text{m}$  (grey, blue lines) and 15  $\mu\text{m}$  (red, green lines) Nafion overlayers in  $\text{N}_2$ -saturated 0.1 M  $\text{NaHCO}_3$  electrolyte at a scan rate of 10 mV/s.

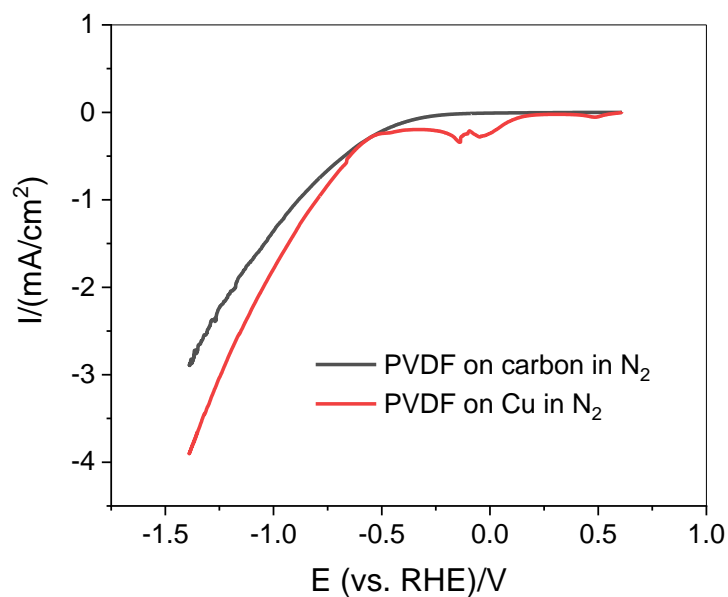

Figure S2. Linear sweep voltammograms of PVDF-modified carbon and Cu foil in  $\text{N}_2$ -saturated 0.1 M  $\text{NaHCO}_3$  electrolyte at a scan rate of 10 mV/s.

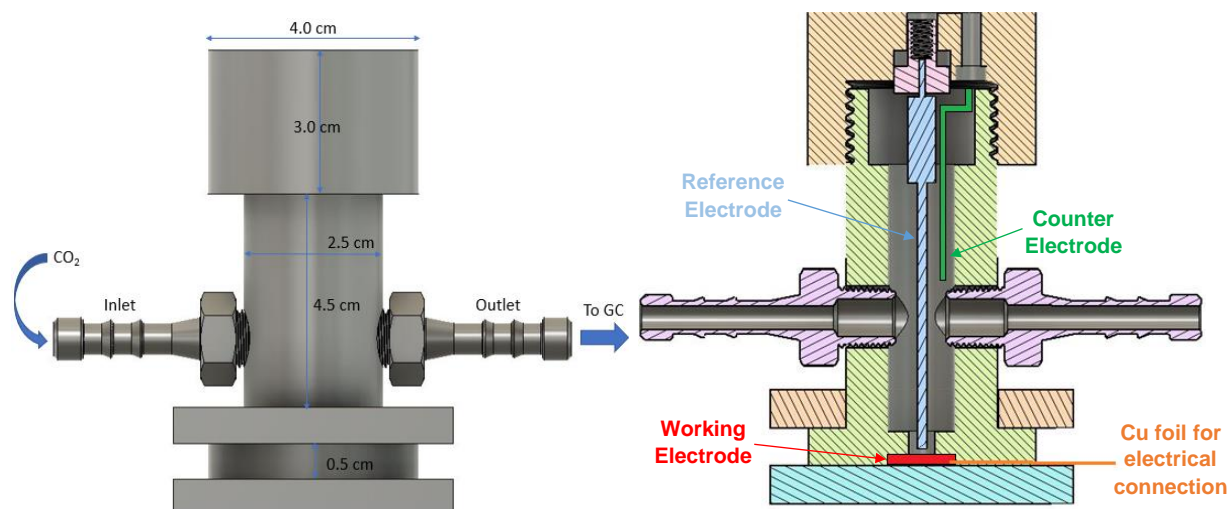

Figure S3. Schematics of custom-made cell for gas collection. The size of the working electrode was  $5.0 \text{ cm}^2$ , and the length of the  $1.0 \text{ mm}$  diameter Pt wire counter electrode was  $3.0 \text{ cm}$ . The reference and counter were  $0.5 \text{ cm}$  away from each other and  $0.5 \text{ cm}$  away from the working electrode. The reference and counter electrodes were positioned through o-ring sealed ports on the top of the cell. The working electrode was placed on the bottom of the cell and was hermetically sealed using a compressed o-ring. The figure on the right highlights the positions of the three electrodes. The volume of solution used for electrocatalysis was  $2.5 \text{ mL}$ . Gas products were purged from the cell by a  $20 \text{ mL}$  glass syringe and sent to the GC for analysis.

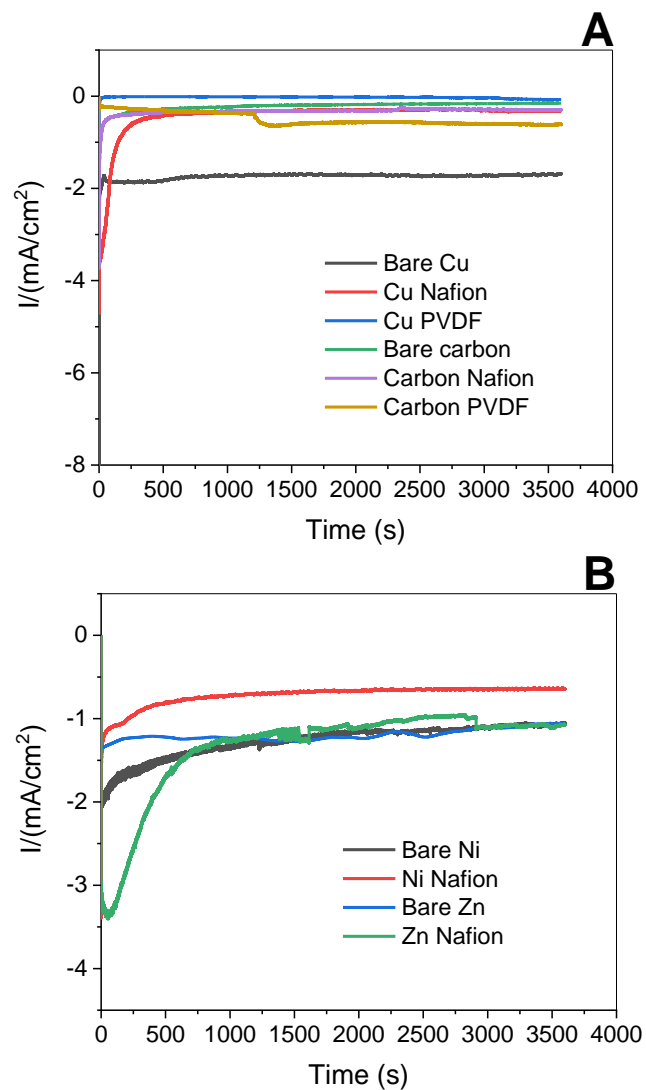

Figure S4. Chronoamperometry curves over 1 hr of electrochemical  $\text{CO}_2$  reduction using bare, Nafion-modified, and PVDF-modified carbon and Cu electrodes (A) and bare and Nafion-modified Ni and Zn electrodes (B).



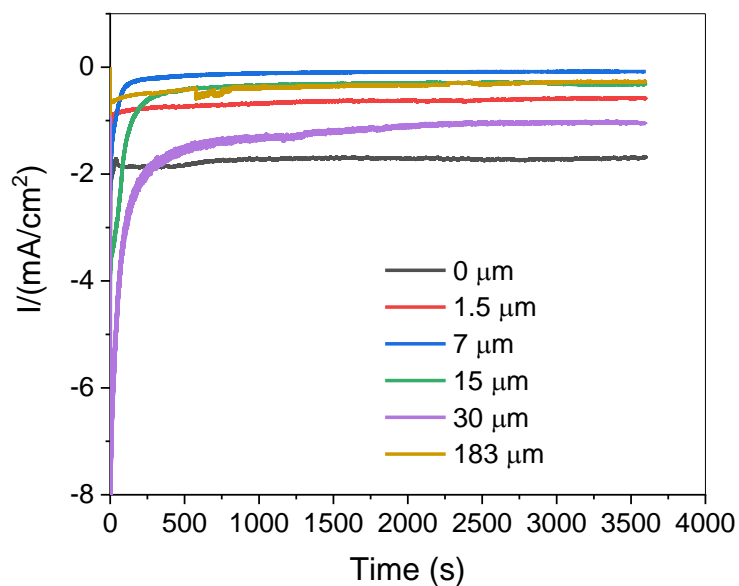

Figure S5. Chronoamperometry curves over 1 hr of electrochemical  $\text{CO}_2$  reduction using varying thicknesses of Nafion overlayer on Cu electrodes.

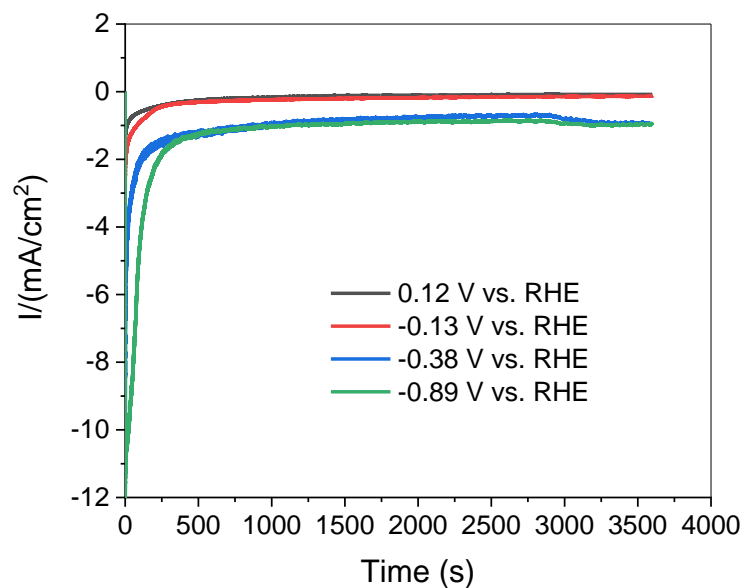

Figure S6. Chronoamperometry curves over 1 hr of electrochemical  $\text{CO}_2$  reduction using Cu electrode modified with 15  $\mu\text{m}$  of Nafion at various voltages.

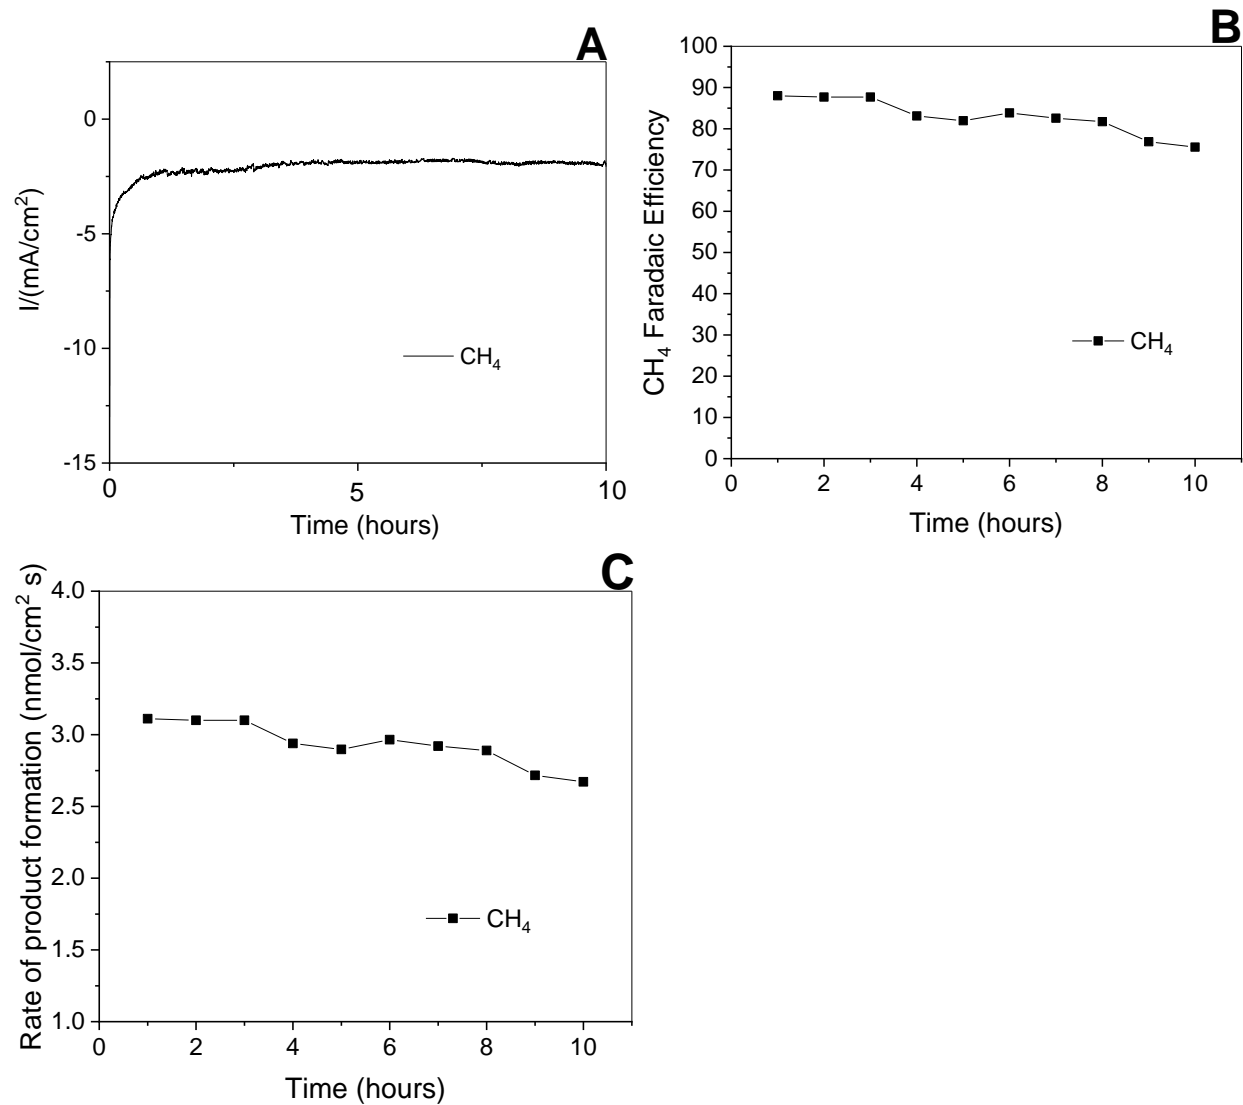

Figure S7. Chronoamperometry (A), Faradaic efficiency (B), and rate (C) of  $\text{CH}_4$  production over 10 hours at  $-0.38\text{ V}$  vs. RHE using a Cu electrode modified with  $15\text{ }\mu\text{m}$  Nafion overlayer.

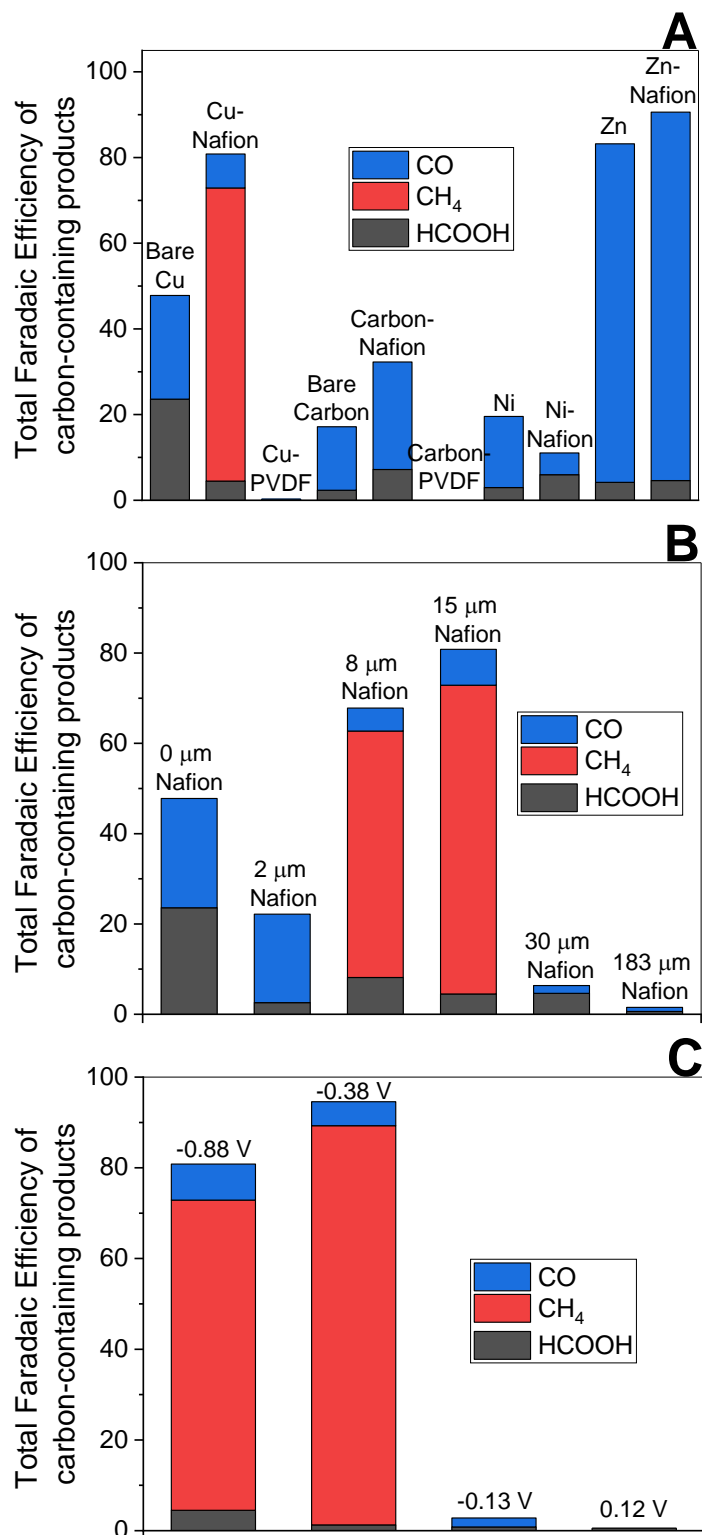

Figure S8. Total Faradaic efficiencies of carbon-containing products obtained from bare electrodes and electrodes modified with 15 μm of Nafion or PVDF (A), varying the thickness of Nafion overlayer on Cu electrode (B), and varying the voltage of the electrochemical reaction (C).

Table S1. R<sup>2</sup> values obtained from linear sweep voltammograms fitted with a linear trend line.

| <b>Electrode</b>              | <b>R<sup>2</sup> value</b> |
|-------------------------------|----------------------------|
| Bare carbon                   | 0.853                      |
| Carbon with 2 $\mu$ m Nafion  | 0.898                      |
| Carbon with 15 $\mu$ m Nafion | 0.997                      |
| Bare Cu                       | 0.871                      |
| Cu with 2 $\mu$ m Nafion      | 0.939                      |
| Cu with 15 $\mu$ m Nafion     | 0.969                      |

Table S2. Faradaic efficiencies for CO, CH<sub>4</sub>, and HCOOH for all catalysts at -0.89 V vs. RHE on bare substrates, 15  $\mu$ m Nafion-modified substrates, and 15  $\mu$ m PVDF-modified substrates.

| <b>Substrate</b> | <b>CO Faradaic Efficiency (%)</b> | <b>CH<sub>4</sub> Faradaic Efficiency (%)</b> | <b>HCOOH Faradaic Efficiency (%)</b> |
|------------------|-----------------------------------|-----------------------------------------------|--------------------------------------|
| Bare Cu          | 24.2 $\pm$ 3                      | 0                                             | 23.6 $\pm$ 4                         |
| Cu-Nafion        | 7.94 $\pm$ 1                      | 68.4 $\pm$ 17                                 | 4.49 $\pm$ 0.8                       |
| Cu-PVDF          | 0.28 $\pm$ 0.03                   | 0                                             | 0                                    |
| Bare carbon      | 14.8 $\pm$ 2                      | 0                                             | 2.36 $\pm$ 0.4                       |
| Carbon-Nafion    | 25.1 $\pm$ 3.5                    | 0                                             | 7.19 $\pm$ 1.2                       |
| Carbon-PVDF      | 0                                 | 0                                             | 0                                    |
| Ni               | 16.6 $\pm$ 2                      | 0                                             | 2.97 $\pm$ 0.5                       |
| Ni-Nafion        | 5.07 $\pm$ 0.7                    | 0                                             | 5.97 $\pm$ 1                         |
| Zn               | 79 $\pm$ 10                       | 0                                             | 4.2 $\pm$ 0.7                        |
| Zn-Nafion        | 86 $\pm$ 11                       | 0                                             | 4.6 $\pm$ 0.7                        |

Table S3. Summary of various electrocatalysts for electrochemical CO<sub>2</sub> reduction to CH<sub>4</sub> reported in literature.

| Catalyst                         | Voltage<br>(vs. RHE) | Electrolyte                           | CH <sub>4</sub> Faradaic<br>Efficiency (%) | Reference |
|----------------------------------|----------------------|---------------------------------------|--------------------------------------------|-----------|
| Cu foil                          | -2.4 V               | NaClO <sub>4</sub> /MeOH              | 70.5                                       | 1         |
| Cu-Co electrode                  | -1.19 V              | 0.1 M KHCO <sub>3</sub>               | 47.5                                       | 2         |
| Cu foil                          | -1.2 V               | 0.1 M KHCO <sub>3</sub>               | 40                                         | 3         |
| Cu electrode                     | -1.04 V              | 0.1 M KHCO <sub>3</sub>               | 33.3                                       | 4         |
| Pd electrode                     | -0.80 V              | 0.1 M KHCO <sub>3</sub>               | 2.9                                        | 4         |
| Cd electrode                     | -1.23 V              | 0.1 M KHCO <sub>3</sub>               | 1.3                                        | 4         |
| Ni electrode                     | -1.08 V              | 0.1 M KHCO <sub>3</sub>               | 1.8                                        | 4         |
| N-doped graphene<br>quantum dots | -0.86 V              | 1 M KOH                               | 15                                         | 5         |
| Ti-phthalocyanine                | -1.58 V              | --                                    | 28.1                                       | 6         |
| Cu-phthalocyanine                | -1.23 V              | --                                    | 28.0                                       | 6         |
| Cu nanofoam                      | -1.5 V               | 0.1 M KHCO <sub>3</sub>               | < 2                                        | 7         |
| Pt GDE                           | -1.32 V              | 0.5 M KHCO <sub>3</sub>               | 38.8                                       | 8         |
| Pt/C                             | 0.0 V                | --                                    | 6.8                                        | 9         |
| Cu single crystal                | -1.01 V              | 0.1 M KHCO <sub>3</sub>               | 6                                          | 10        |
| Cu mesh                          | -1.2 V               | 2 M KBr                               | 28.8                                       | 11        |
| Cu nanocubes (24 nm)             | -1.1 V               | 0.1 M KHCO <sub>3</sub>               | 15                                         | 12        |
| Cu nanocubes (44 nm)             | -1.1 V               | 0.1 M KHCO <sub>3</sub>               | 22                                         | 12        |
| Cu nanocubes (63 nm)             | -1.1 V               | 0.1 M KHCO <sub>3</sub>               | 10                                         | 12        |
| Cu foil                          | -1.1 V               | 0.1 M KHCO <sub>3</sub>               | 18                                         | 12        |
| Polycrystalline Cu               | -1.0 V               | 0.1 M KHCO <sub>3</sub>               | 4.6                                        | 13        |
| Cu nanoparticles                 | -1.35 V              | 0.1 M NaHCO <sub>3</sub>              | 76                                         | 14        |
| Cu <sub>2</sub> O/Zn             | -1.9 V               | 0.3 M KOH in<br>MeOH                  | 7.5                                        | 15        |
| Nanoporous carbon                | -1.6 V               | 0.1 M KHCO <sub>3</sub>               | 0.18                                       | 16        |
| Cu electrode                     | -1.05 V              | 0.1 M LiHCO <sub>3</sub>              | 32.2                                       | 17        |
| Cu electrode                     | -1.05 V              | 0.1 M NaHCO <sub>3</sub>              | 55.1                                       | 17        |
| Cu electrode                     | -0.99 V              | 0.1 M KHCO <sub>3</sub>               | 32.0                                       | 17        |
| Cu electrode                     | -0.98 V              | 0.1 M CsHCO <sub>3</sub>              | 16.3                                       | 17        |
| Cu <sub>2</sub> O films          | -1.1 V               | 0.1 M KHCO <sub>3</sub>               | 5                                          | 18        |
| Cu <sub>2</sub> O films          | -0.99 V              | 0.1 M KHCO <sub>3</sub>               | < 1                                        | 19        |
| Cu electrode                     | -1.01 V              | 0.1 M KHCO <sub>3</sub>               | 29.4                                       | 20        |
| Cu electrode                     | -1.04 V              | 0.1 M KCl                             | 11.5                                       | 20        |
| Cu electrode                     | -0.99 V              | 0.5 M KCl                             | 14.5                                       | 20        |
| Cu electrode                     | -1.00 V              | 0.1 M KClO <sub>4</sub>               | 10.2                                       | 20        |
| Cu electrode                     | -1.00 V              | 0.1M K <sub>2</sub> SO <sub>4</sub>   | 12.3                                       | 20        |
| Cu electrode                     | -0.83 V              | 0.5 M K <sub>2</sub> HPO <sub>4</sub> | 17.0                                       | 20        |
| Cu electrode                     | -0.77 V              | 0.1 M K <sub>2</sub> HPO <sub>4</sub> | 6.6                                        | 20        |
| Cu electrode                     | -0.96 V              | 0.1 M KHCO <sub>3</sub>               | 22.3                                       | 21        |
| Fe electrode                     | -0.98 V              | 0.1 M KHCO <sub>3</sub>               | 1.1                                        | 21        |
| Ni electrode                     | -1.09 V              | 0.1 M KHCO <sub>3</sub>               | 1.1                                        | 21        |

|                                |         |                                                 |      |    |
|--------------------------------|---------|-------------------------------------------------|------|----|
| Cu electrode                   | -1.0 V  | 0.1 M KHCO <sub>3</sub>                         | 3    | 22 |
| Cu-Ni electrode                | -1.3 V  | 0.5 M KHCO <sub>3</sub>                         | 20.2 | 23 |
| Ag electrode                   | -1.4 V  | 0.1 M KHCO <sub>3</sub>                         | 0.09 | 24 |
| Ni electrode                   | -1.00 V | 0.1 M KHCO <sub>3</sub>                         | 0.6  | 25 |
| Ni electrode                   | -1.08 V | 0.1 M KHCO <sub>3</sub>                         | 1.8  | 25 |
| Ni electrode                   | -1.02 V | 0.1 M KHCO <sub>3</sub>                         | 2.4  | 25 |
| Cu sheet                       | -1.00 V | 0.1 M KHCO <sub>3</sub>                         | 16.3 | 26 |
| Cu <sub>2</sub> O/carbon black | -1.3 V  | NaCl/MeOH                                       | 26.9 | 27 |
| Cu sheet                       | -1.35 V | 0.1 M KHCO <sub>3</sub>                         | 44   | 28 |
| Cu porphyrin                   | -1.0 V  | 0.5 M KHCO <sub>3</sub>                         | 26   | 29 |
| Cu electrode                   | -1.35 V | 0.5 M KHCO <sub>3</sub>                         | 5.3  | 30 |
| Cu electrode                   | -1.6 V  | 1.1 M KHCO <sub>3</sub>                         | 44   | 31 |
| Cu electrode                   | -2.4 V  | 0.5 M LiClO <sub>4</sub> /MeOH                  | 71.8 | 32 |
| Cu wire electrode              | -3.35 V | Tetraethylammonium<br>perchlorate methanol      | 28.1 | 33 |
| Cu nanoparticles               | -1.3 V  | 0.1 M KHCO <sub>3</sub>                         | 50   | 34 |
| Cu <sub>2</sub> Pd             | -1.2 V  | 0.1 M<br>TBAPF <sub>6</sub> /CH <sub>3</sub> CN | 55   | 35 |
| Co protoporphyrin              | -0.8 V  | 0.1 M HClO <sub>4</sub>                         | 2.5  | 36 |
| Polycrystalline Cu             | -1.4 V  | 0.5 M KHCO <sub>3</sub>                         | 42   | 37 |

## References

1. S. Kaneco, H. Katsumata, T. Suzuki and K. Ohta, Electrochemical Reduction of CO<sub>2</sub> to Methane at the Cu Electrode in Methanol with Sodium Supporting Salts and Its Comparison with Other Alkaline Salts. *Energy Fuels*, 2006, **20** (1), 409-414.
2. Y. Takatsuji, I. Nakata, M. Morimoto, T. Sakakura, R. Yamasaki and T. Haruyama, Highly Selective Methane Production Through Electrochemical CO<sub>2</sub> reduction by Electrolytically Plated Cu-Co Electrode. *Electrocatalysis*, 2019, **10** (1), 29-34.
3. K. P. Kuhl, E. R. Cave, D. N. Abram and T. F. Jaramillo, New insights into the electrochemical reduction of carbon dioxide on metallic copper surfaces. *Energy Environ. Sci.*, 2012, **5** (5), 7050-7059.
4. Y. Hori, H. Wakebe, T. Tsukamoto and O. Koga, Electrocatalytic process of CO selectivity in electrochemical reduction of CO<sub>2</sub> at metal electrodes in aqueous media. *Electrochim. Acta*, 1994, **39** (11), 1833-1839.
5. J. Wu, S. Ma, J. Sun, J. I. Gold, C. Tiwary, B. Kim, L. Zhu, N. Chopra, I. N. Odeh, R. Vajtai, A. Z. Yu, R. Luo, J. Lou, G. Ding, P. J. A. Kenis and P. M. Ajayan, A metal-free electrocatalyst for carbon dioxide reduction to multi-carbon hydrocarbons and oxygenates. *Nat. Commun.*, 2016, **7** (1), 13869.
6. N. Furuya and S. Koide, Electroreduction of carbon dioxide by metal phthalocyanines. *Electrochim. Acta*, 1991, **36** (8), 1309-1313.
7. S. Sen, D. Liu and G. T. R. Palmore, Electrochemical Reduction of CO<sub>2</sub> at Copper Nanofoams. *ACS Catal.*, 2014, **4** (9), 3091-3095.
8. K. Hara, Electrocatalytic Formation of CH<sub>4</sub> from CO<sub>2</sub> on a Pt Gas Diffusion Electrode. *J. Electrochem. Soc.*, 1997, **144** (2), 539.
9. M. Umeda, Y. Niitsuma, T. Horikawa, S. Matsuda and M. Osawa, Electrochemical Reduction of CO<sub>2</sub> to Methane on Platinum Catalysts without Overpotentials: Strategies for Improving Conversion Efficiency. *ACS Appl. Energy Mater.*, 2020, **3** (1), 1119-1127.
10. I. Takahashi, O. Koga, N. Hoshi and Y. Hori, Electrochemical reduction of CO<sub>2</sub> at copper single crystal Cu(S)-[n(111)×(111)] and Cu(S)-[n(110)×(100)] electrodes. *J. Electroanal. Chem.*, 2002, **533** (1), 135-143.
11. H. Yano, T. Tanaka, M. Nakayama and K. Ogura, Selective electrochemical reduction of CO<sub>2</sub> to ethylene at a three-phase interface on copper(I) halide-confined Cu-mesh electrodes in acidic solutions of potassium halides. *J. Electroanal. Chem.*, 2004, **565** (2), 287-293.
12. A. Loiudice, P. Lobaccaro, E. A. Kamali, T. Thao, B. H. Huang, J. W. Ager and R. Buonsanti, Tailoring Copper Nanocrystals towards C<sub>2</sub> Products in Electrochemical CO<sub>2</sub> Reduction. *Angew. Chem. Int. Ed.*, 2016, **55** (19), 5789-5792.
13. Y. Kwon, Y. Lum, E. L. Clark, J. W. Ager and A. T. Bell, CO<sub>2</sub> Electroreduction with Enhanced Ethylene and Ethanol Selectivity by Nanostructuring Polycrystalline Copper. *ChemElectroChem*, 2016, **3** (6), 1012-1019.
14. K. Manthiram, B. J. Beberwyck and A. P. Alivisatos, Enhanced Electrochemical Methanation of Carbon Dioxide with a Dispersible Nanoscale Copper Catalyst. *J. Am. Chem. Soc.*, 2014, **136** (38), 13319-13325.
15. S. Ohya, S. Kaneco, H. Katsumata, T. Suzuki and K. Ohta, Electrochemical reduction of CO<sub>2</sub> in methanol with aid of CuO and Cu<sub>2</sub>O. *Catal.*, 2009, **148** (3), 329-334.
16. W. Li, M. Seredych, E. Rodríguez-Castellón and T. J. Bandosz, Metal-free Nanoporous Carbon as a Catalyst for Electrochemical Reduction of CO<sub>2</sub> to CO and CH<sub>4</sub>. *ChemSusChem*, 2016, **9** (6), 606-616.

17. A. Murata and Y. Hori, Product Selectivity Affected by Cationic Species in Electrochemical Reduction of CO<sub>2</sub> and CO at a Cu Electrode. *Bull. Chem. Soc. Jpn.*, 1991, **64** (1), 123-127.
18. R. Kas, R. Kortlever, A. Milbrat, M. T. M. Koper, G. Mul and J. Baltrusaitis, Electrochemical CO<sub>2</sub> reduction on Cu<sub>2</sub>O-derived copper nanoparticles: controlling the catalytic selectivity of hydrocarbons. *Phys. Chem. Chem. Phys.*, 2014, **16** (24), 12194-12201.
19. D. Ren, Y. Deng, A. D. Handoko, C. S. Chen, S. Malkhandi and B. S. Yeo, Selective Electrochemical Reduction of Carbon Dioxide to Ethylene and Ethanol on Copper(I) Oxide Catalysts. *ACS Catal.* 2015, **5** (5), 2814-2821.
20. Y. Hori, A. Murata and R. Takahashi, Formation of hydrocarbons in the electrochemical reduction of carbon dioxide at a copper electrode in aqueous solution. *J. Chem. Soc. Faraday Trans.*, 1989, **85** (8), 2309-2326.
21. Y. Hori, R. Takahashi, Y. Yoshinami and A. Murata, Electrochemical Reduction of CO at a Copper Electrode. *J. Phys. Chem. B*, 1997, **101** (36), 7075-7081.
22. Y. Lum, B. Yue, P. Lobaccaro, A. T. Bell and J. W. Ager, Optimizing C–C Coupling on Oxide-Derived Copper Catalysts for Electrochemical CO<sub>2</sub> Reduction. *J. Phys. Chem. C*, 2017, **121** (26), 14191-14203.
23. S. S. Y. Kaneco, H. Katsumata, T. Suzuki and K. Ohta, Cu-deposited Nickel Electrode for the Electrochemical Conversion of CO<sub>2</sub> in Water/methanol Mixture Media. *Bull. Catal. Soc. India*, 2007, **6**, 71-82.
24. T. Hatsukade, K. P. Kuhl, E. R. Cave, D. N. Abram and T. F. Jaramillo, Insights into the electrocatalytic reduction of CO<sub>2</sub> on metallic silver surfaces. *Phys. Chem. Chem. Phys.*, 2014, **16** (27), 13814-13819.
25. Y. Hori and A. Murata, Electrochemical evidence of intermediate formation of adsorbed CO in cathodic reduction of CO<sub>2</sub> at a nickel electrode. *Electrochim. Acta*, 1990, **35** (11), 1777-1780.
26. Y. Hori, A. Murata, R. Takahashi and S. Suzuki, Electroreduction of carbon monoxide to methane and ethylene at a copper electrode in aqueous solutions at ambient temperature and pressure. *J. Am. Chem. Soc.*, 1987, **109** (16), 5022-5023.
27. N. Uemoto, M. Furukawa, I. Tateishi, H. Katsumata and S. Kaneco, Electrochemical Carbon Dioxide Reduction in Methanol at Cu and Cu<sub>2</sub>O-Deposited Carbon Black Electrodes. *ChemEngineering*, 2019, **3** (1), 1-10.
28. A. Engelbrecht, C. Uhlig, O. Stark, M. Hämmerle, G. Schmid, E. Magori, K. Wiesner-Fleischer, M. Fleischer and R. Moos, On the Electrochemical CO<sub>2</sub> Reduction at Copper Sheet Electrodes with Enhanced Long-Term Stability by Pulsed Electrolysis. *J. Electrochem. Soc.*, 2018, **165** (15), J3059-J3068.
29. Z. Weng, J. Jiang, Y. Wu, Z. Wu, X. Guo, K. L. Materna, W. Liu, V. S. Batista, G. W. Brudvig and H. Wang, Electrochemical CO<sub>2</sub> Reduction to Hydrocarbons on a Heterogeneous Molecular Cu Catalyst in Aqueous Solution. *J. Am. Chem. Soc.*, 2016, **138** (26), 8076-8079.
30. D. W. Dewulf and A. J. Bard, The electrochemical reduction of CO<sub>2</sub> to CH<sub>4</sub> and C<sub>2</sub>H<sub>4</sub> at Cu/Nafion electrodes (solid polymer electrolyte structures). *Catal. Lett.*, 1988, **1** (1), 73-79.
31. S. Kaneco, N.-h. Hiei, Y. Xing, H. Katsumata, H. Ohnishi, T. Suzuki and K. Ohta, High-efficiency electrochemical CO<sub>2</sub>-to-methane reduction method using aqueous KHCO<sub>3</sub> media at less than 273 K. *J. Solid State Electr.*, 2003, **7** (3), 152-156.
32. S. Kaneco, K. Iiba, M. Yabuuchi, N. Nishio, H. Ohnishi, H. Katsumata, T. Suzuki and K. Ohta, High Efficiency Electrochemical CO<sub>2</sub>-to-Methane Conversion Method Using Methanol with Lithium Supporting Electrolytes. *Ind. Eng. Chem. Res.*, 2002, **41** (21), 5165-5170.



33. S. Kaneco, K. Iiba, K. Ohta and T. Mizuno, Electrochemical CO<sub>2</sub> Reduction on a Copper Wire Electrode in Tetraethylammonium Perchlorate Methanol at Extremely Low Temperature. *Energy Sources*, 1999, **21** (7), 643-648.
34. M. K. Kim, H. J. Kim, H. Lim, Y. Kwon and H. M. Jeong, Metal–organic framework-mediated strategy for enhanced methane production on copper nanoparticles in electrochemical CO<sub>2</sub> reduction. *Electrochim. Acta*, 2019, **306**, 28-34.
35. S. Zhang, P. Kang, M. Bakir, A. M. Lapides, C. J. Dares and T. J. Meyer, Polymer-supported CuPd nanoalloy as a synergistic catalyst for electrocatalytic reduction of carbon dioxide to methane. *Proc. Natl. Acad. Sci.*, 2015, **112** (52), 15809.
36. J. Shen, R. Kortlever, R. Kas, Y. Y. Birdja, O. Diaz-Morales, Y. Kwon, I. Ledezma-Yanez, K. J. P. Schouten, G. Mul and M. T. M. Koper, Electrocatalytic reduction of carbon dioxide to carbon monoxide and methane at an immobilized cobalt protoporphyrin. *Nat. Commun.*, 2015, **6** (1), 8177.
37. H. Hashiba, H. K. Sato, S. Yotsuhashi, K. Fujii, M. Sugiyama and Y. Nakano, A broad parameter range for selective methane production with bicarbonate solution in electrochemical CO<sub>2</sub> reduction. *Sustain. Energy Fuels*, 2017, **1** (8), 1734-1739.
38. B. Flaconnèche, J. Martin and M. H. Klopffer, Permeability, Diffusion and Solubility of Gases in Polyethylene, Polyamide 11 and Poly (Vinylidene Fluoride). *Oil Gas Sci. Technol. - Rev. IFP*, 2001, **56** (3), 261-278.
39. X. Ren, T. D. Myles, K. N. Grew and W. K. S. Chiu, Carbon Dioxide Transport in Nafion 1100 EW Membrane and in a Direct Methanol Fuel Cell. *J. Electrochem. Soc.*, 2015, **162** (10), F1221-F1230.
40. N. P. Cele and S. S. Ray, Effect of Multiwalled Carbon Nanotube Loading on the Properties of Nafion Membranes. *J. Mater. Res.*, 2015, **30** (1), 66-78.
